# Supplementary material for: Genistein antagonizes gliadin-induced CFTR malfunction in models of celiac disease
Source: Aging (Albany NY). 2019 Apr 12;11(7):2003–19. doi: 10.18632/aging.101888 (PMC6503870; doi:10.18632/aging.101888)
Supplement: Supplementary Figures [file aging-11-101888-s001.pdf]

## SUPPLEMENTARY FIGURES

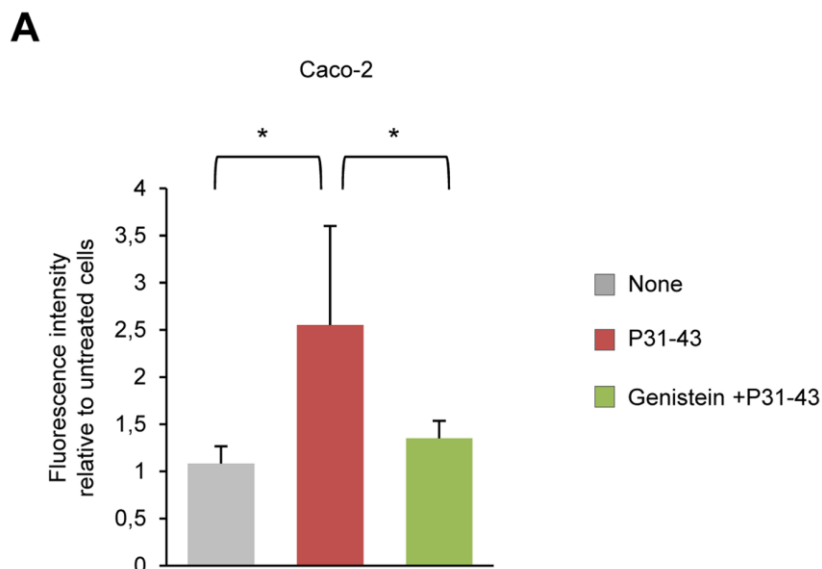

**Supplementary Figure 1. Genistein reverses oxidative stress induced by P31-43.** The cells were challenged with P31-43 (20 $\mu$ g/ml for 24 hours) in presence or in absence of a 20 min pre-incubation with genistein. Cells were afterwards loaded with CellROX (cellular ROS probe; 5  $\mu$ M for 10 min at 37°C) and analyzed by confocal microscopy. Quantification of cellular ROS. Means  $\pm$  SD of three independent experiments. Two paired Student's *t* test, \**p*<0.05 versus untreated cells and versus P31-43-treated cells.

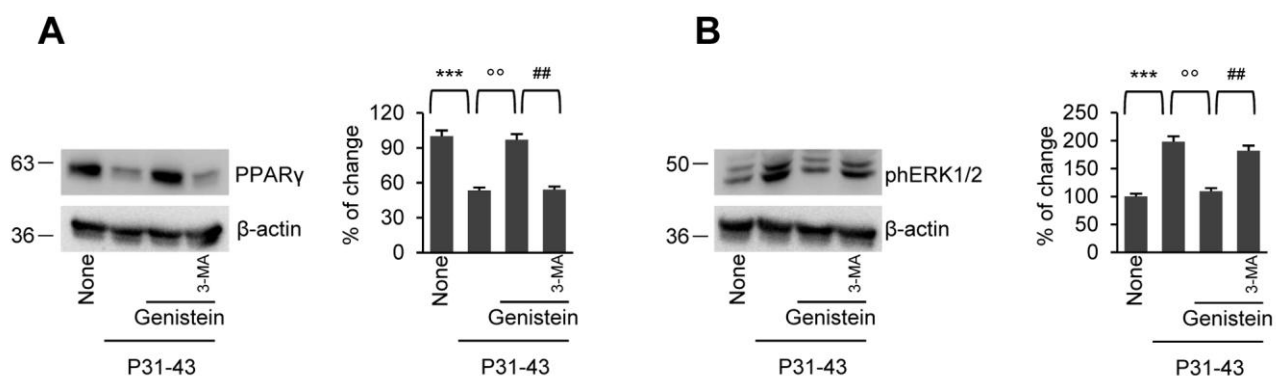

**Supplementary Figure 2. 3-MA abrogates the effect of genistein on signs of mucosal inflammation.** (A-B) Genistein-treated cells were incubated with P31-43 in the presence or absence of 3-MA. Immunoblot of ph-ERK 1/2 (A) or PPAR $\gamma$  (B) and densitometric analyses of protein levels.  $\beta$ -actin was used as loading control. Means $\pm$ SD of three independent experiments; \*\*\**p*<0.001 versus untreated cells, °°*p*<0.01 versus P31-43-challenged cells and ##*p*<0.01 versus P31-43-challenged cells pre-treated with Genistein (ANOVA, Bonferroni post-hoc test).
